# Supplementary material
Source: PubMed Central journal article supplement (PMC4478444)
Supplement: NIHMS699174-supplement-supplement_1.pdf [file NIHMS699174-supplement-supplement_1.pdf]

A

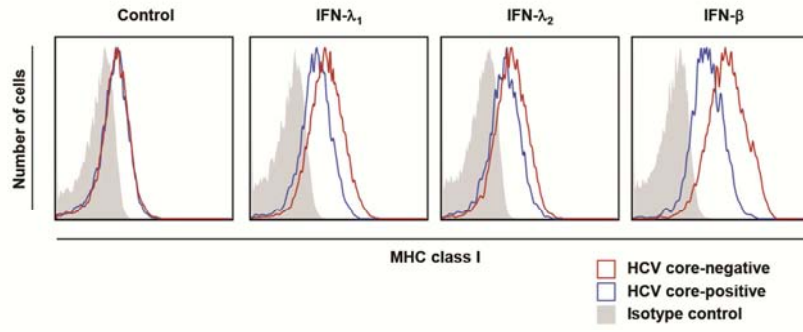

B

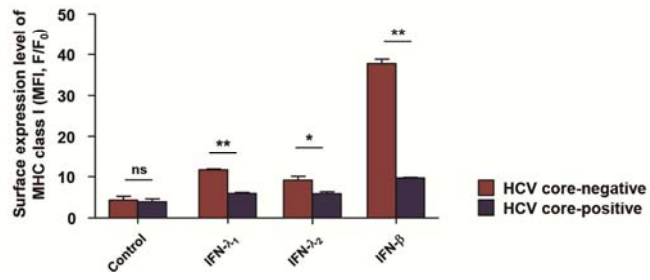

A

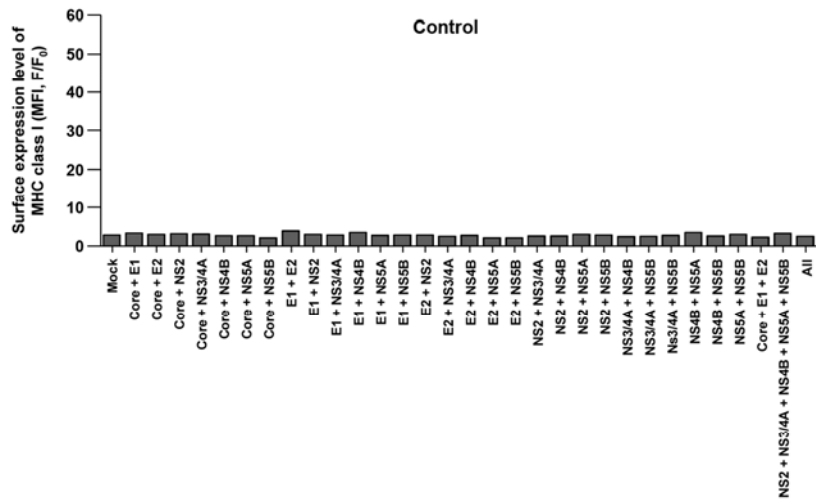

B

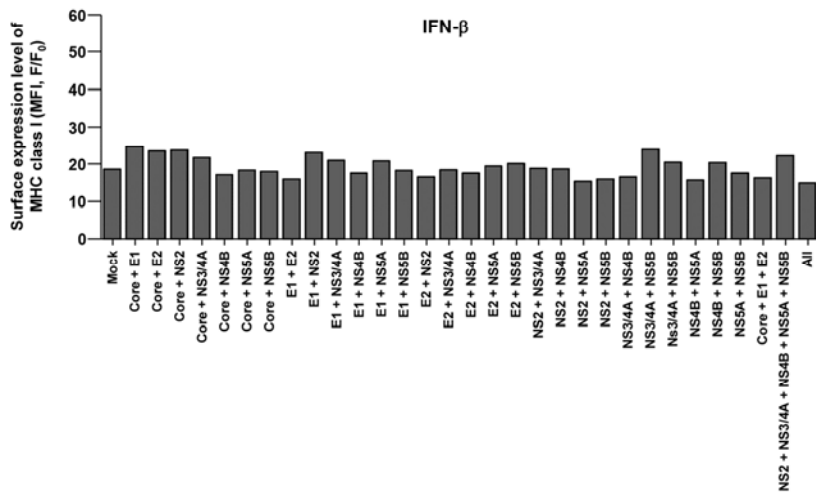

**A**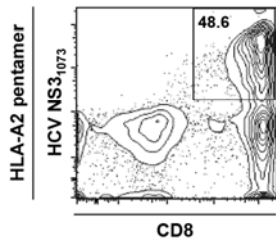**B**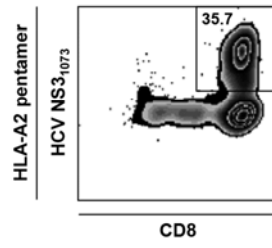

ACCEPTED MANUSCRIPT

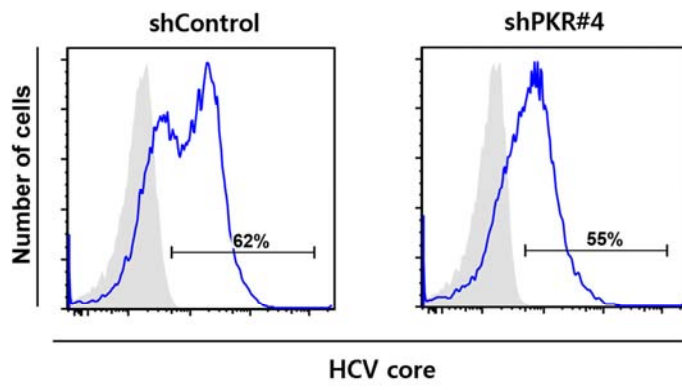

## 1 **Supplementary Materials and Methods**

2

### 3 ***Cell culture***

4 Huh-7.5 cells were cultured at 37°C with 5% CO<sub>2</sub> in Dulbecco's Modified Eagle Medium (DMEM;  
5 Welgene) supplemented with 10% fetal bovine serum (FBS; Welgene), 4.5 g/L glucose, L-glutamine, and  
6 1% penicillin/streptomycin (Invitrogen). Stable HLA-A2-transfectants were maintained in complete  
7 medium supplemented with 1 mg/mL G418 (A.G. Scientific, San Diego, CA). PKR-silenced cell lines  
8 were maintained in complete medium supplemented with 1 µg/mL puromycin (Sigma-Aldrich). HCV-  
9 specific CD8<sup>+</sup> T cells were expanded in RPMI 1640 (Welgene) supplemented with 5% FBS, 1%  
10 penicillin/streptomycin in the presence of relevant cytokines as described below. For HCV RNA  
11 transfection studies, Huh-7.5 cells were transfected with *in vitro*-transcribed, replication-competent JFH-1  
12 using DMRIE-C reagent (Invitrogen,).

13

### 14 ***Confocal microscopy***

15 The antibodies used for confocal imaging included mouse monoclonal anti-HCV core IgG<sub>1</sub> (Clone C7-50),  
16 rabbit monoclonal anti-MHC class I (Clone EP1395Y), AlexaFluor 594-conjugated donkey anti-mouse  
17 IgG (Invitrogen), and AlexaFluor 488-conjugated donkey anti-rabbit IgG (Invitrogen). HCV-infected or  
18 uninfected Huh-7.5 cells were plated on 4-well Lab-Tek Chamber slides (Nunc, Naperville, IL) and  
19 treated with IFN-β for 24 h. Cells were fixed with 4% paraformaldehyde in PBS, permeabilized with 0.2%  
20 (v/v) Triton-X100, and incubated with primary antibodies (1:300 dilution). After washing with PBS, the  
21 slides were incubated with secondary antibody conjugates (1:500 dilution). After nuclear staining with  
22 DAPI and mounting, images were acquired on a LSM-710 confocal laser scanning microscope (Carl  
23 Zeiss, Jena, Germany).

24

1 ***PKR shRNA clones***

2 Five validated clones of MISSION<sup>®</sup> shRNA bacterial glycerol stocks with lentiviral constructs expressing  
3 PKR shRNA were purchased from Sigma-Aldrich: NM\_002759.x-2288s1c1 (TRCN0000001379),  
4 NM\_002759.x-1409s1c1 (TRCN0000001381), NM\_002759.x-2010s1c1 (TRCN0000001382),  
5 NM\_002759.1-1870s1c1 (TRCN0000196400), and NM\_002759.1-1580s1c1 (TRCN0000197012).

6  
7 ***TaqMan real-time PCR***

8 Total RNA isolation, cDNA synthesis, and TaqMan real-time PCR were performed as previously  
9 described<sup>22</sup>. In brief, total RNA was isolated with the RNeasy Mini kit (Qiagen, Valencia, CA), and  
10 cDNA was synthesized using the First-Strand cDNA Synthesis kit (Origene/Marligen Biosciences,  
11 Ijamsville, MD). TaqMan Gene Expression Assays (Applied Biosystems, Foster City, CA) were used to  
12 determine mRNA levels of HLA-A. Target mRNA levels were normalized to an endogenous reference  
13 gene ( $\beta$ -actin).

14  
15 ***Statistical analysis***

16 Data are presented as mean + standard error of mean. Two-tailed Mann-Whitney U test or unpaired t-test  
17 was performed where appropriate. Statistical analyses were performed with GraphPad Prism version 5.01  
18 (GraphPad Software, San Diego, CA). A *p* value of less than 0.05 was considered statistically significant.

19

20

1 **Supplementary Figure legends**

2

3 **Supplementary Figure 1. IFN- $\lambda$ -induced MHC class I expression is attenuated by HCV infection.**

4 Huh-7.5 cells were inoculated with HCVcc at 0.01 MOI and cultured for 3 days, with an infection rate of  
5 30-45%. Cells were then treated with 100 ng/mL IFN- $\lambda_1$ , 100 ng/mL IFN- $\lambda_2$  or 3 ng/mL IFN- $\beta$  or were  
6 left untreated (control). (A) The expression level of MHC class I in HCV-infected (blue) or uninfected  
7 (red) cells was analyzed by co-staining for HCV core and MHC class I and flow cytometry. (B) Data from  
8 three independent experiments are presented as a bar graph (mean + SEM). \*,  $P < 0.05$ ; \*\*,  $P < 0.01$ ; ns,  
9 not significant.

10

11 **Supplementary Figure 2. Effect of HCV gene transfection on IFN-induced MHC class I expression.**

12 Huh-7.5 cells were transfected with pairs of HCV gene plasmids in 28 combinations. In addition,  
13 transfection was performed with all structural protein genes (core, E1 and E2), all non-structural protein  
14 genes (NS2, NS3/4A, NS4B, NS5A and NS5B) or all HCV genes (core, E1, E2, NS2, NS3/4A, NS4B,  
15 NS5A and NS5B). The transfected cells were treated with 3 ng/mL IFN- $\beta$  for 24 h. The expression level  
16 of MHC class I was analyzed by flow cytometry (A), and the MFI of MHC class I expression is presented  
17 (B). F, fluorescence intensity of stained sample;  $F_0$ , fluorescence intensity of isotype control.

18

19 **Supplementary Figure 3. HCV-specific CD8<sup>+</sup> T cell lines used for co-culture experiments.**

20 NS31073 (CINGVCWTV)-specific CD8<sup>+</sup> T cells and core35 (YLLPRRGPRRL)-specific CD8<sup>+</sup> T cells  
21 were expanded from PBMC of HLA-A2<sup>+</sup> patients with acute HCV infection (genotype 1a) as described  
22 in Materials and Methods. The frequency of NS31073-specific CD8<sup>+</sup> T cells (A) and core35-specific  
23 CD8<sup>+</sup> T cells (B) was determined with MHC class I pentamers.

1  
2 **Supplementary Figure 4. HCV infection rates in PKR-silenced and unsilenced cells.** shControl-  
3 transduced Huh-7.5/P<sub>(HLA-A2)</sub>-(HLA-A2) (left) or shPKR#4-transduced Huh-7.5/P<sub>(HLA-A2)</sub>-(HLA-A2) (right)  
4 cells were infected with HCVcc at 0.1 MOI, cultured for 3 days, and treated with 3 ng/mL IFN- $\beta$  for 24 h.  
5 Then, the infection rate was determined with anti-HCV core immunostaining and flow cytometry.  
6 Representative FACS histograms are presented.
